# Supplementary material for: Identification of two organohalide-respiring Dehalococcoidia associated to different dechlorination activities in PCB-impacted marine sediments
Source: PubMed Central journal article supplement (PMC5525228; doi:10.1186/s12934-017-0743-4), 2017-07-24
Supplement: 12934_2017_743_MOESM1_ESM.pdf [file 12934_2017_743_MOESM1_ESM.pdf]

1 **Table S1:** PCB total concentration and congeners distribution of the sediment samples used in this study. Values  
 2 are the mean ( $\pm$  SD) of replicate analysis on three sediment subsamples.

| <b>Sediment</b> | <b>Total PCB concentration</b><br>( <i>mg PCBs (kg dry sediment)<sup>-1</sup></i> ) | <b>Di- and tri-chlorinated congeners</b><br>(wt %) | <b>Tetra- and penta-chlorinated congeners</b><br>(wt %) | <b>Hexa- and hepta-chlorinated congeners</b><br>(wt %) | <b>Octa- and nona-chlorinated congeners</b><br>(wt %) |
|-----------------|-------------------------------------------------------------------------------------|----------------------------------------------------|---------------------------------------------------------|--------------------------------------------------------|-------------------------------------------------------|
| <b>A</b>        | 0.4 $\pm$ 0.1                                                                       | 0.26%                                              | 28.08%                                                  | 5.02%                                                  | 66.64%                                                |
| <b>B</b>        | 1.5 $\pm$ 0.8                                                                       | 0.00%                                              | 0.75%                                                   | 5.96%                                                  | 93.29%                                                |
| <b>C</b>        | 1.3 $\pm$ 0.2                                                                       | 0.02%                                              | 1.52%                                                   | 3.13%                                                  | 95.33%                                                |
| <b>D</b>        | 3.3 $\pm$ 2.8                                                                       | 0.00%                                              | 0.91%                                                   | 27.27%                                                 | 71.81%                                                |
| <b>E</b>        | 0.6 $\pm$ 0.1                                                                       | 0.00%                                              | 3.00%                                                   | 6.66%                                                  | 90.34%                                                |
| <b>F</b>        | 0.2 $\pm$ 0.0                                                                       | 0.00%                                              | 5.11%                                                   | 10.36%                                                 | 84.54%                                                |

3
