# Supplementary material for: Identification of two organohalide-respiring Dehalococcoidia associated to different dechlorination activities in PCB-impacted marine sediments
Source: PubMed Central journal article supplement (PMC5525228; doi:10.1186/s12934-017-0743-4), 2017-07-24
Supplement: 12934_2017_743_MOESM4_ESM.pdf [file 12934_2017_743_MOESM4_ESM.pdf]

1 **Table S2:** Features of primer pairs designed to target the 16S rRNA genes of VLD-1 and VLD-2 phylotypes.

| Target<br>microorganism  | Primer |                        |                           | Product<br>length<br>(bp) | Non-target products<br>(per mismatch) |   |    |
|--------------------------|--------|------------------------|---------------------------|---------------------------|---------------------------------------|---|----|
|                          | Name   | Sequence (5'→3')       | <i>T<sub>m</sub></i> (°C) |                           | 0                                     | 1 | 2  |
| Uncultured               | 682f   | AGGCGAAAGCGGTTTCAA     | 60.5                      | 153                       | 0                                     | 4 | 26 |
| <i>Chloroflexi</i> VLD-1 | 814r   | ACTTAAAGCGTTAGCTTCGGCA | 60.3                      |                           |                                       |   |    |
| Uncultured               | 585f   | TCAACTGGGAGGAGTCATTCG  | 59.5                      | 133                       | 0                                     | 6 | 11 |
| <i>Chloroflexi</i> VLD-2 | 697r   | GAAACAGCCTAGAAAACCGCC  | 59.8                      |                           |                                       |   |    |

2

3
